# Supplementary figures and images for: The Firmicutes/Bacteroidetes ratio of the human microbiota changes with age
Source: Springer Nature journal article supplement (doi:10.1186/1471-2180-9-123), 2009-01-01

*Firmicutes / Bacteroidetes ratio*

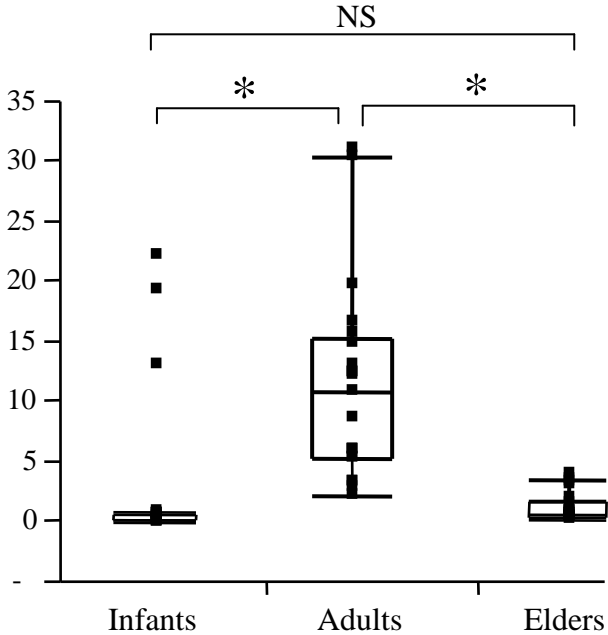

Supplement: 12866_2009_794_MOESM1_ESM.pdf [file 12866_2009_794_MOESM1_ESM.pdf]

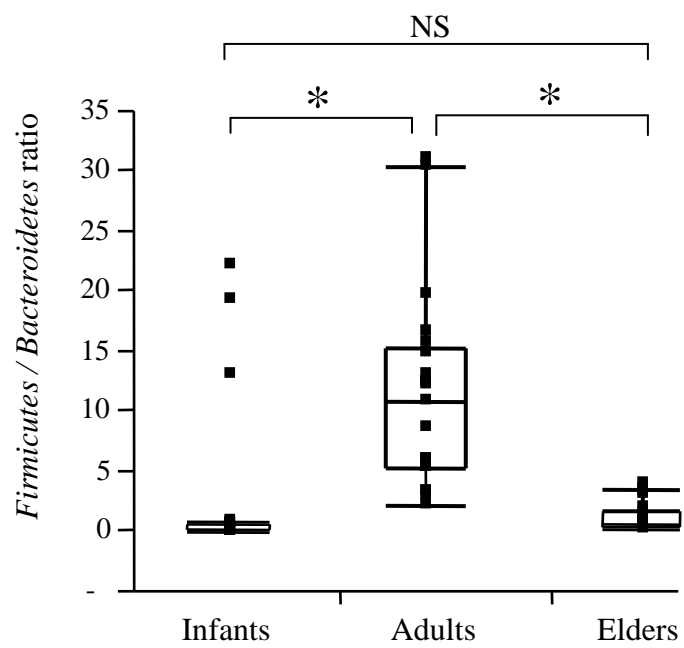

**Figure 1**

Supplement: 12866_2009_794_MOESM2_ESM.pdf [file 12866_2009_794_MOESM2_ESM.pdf]

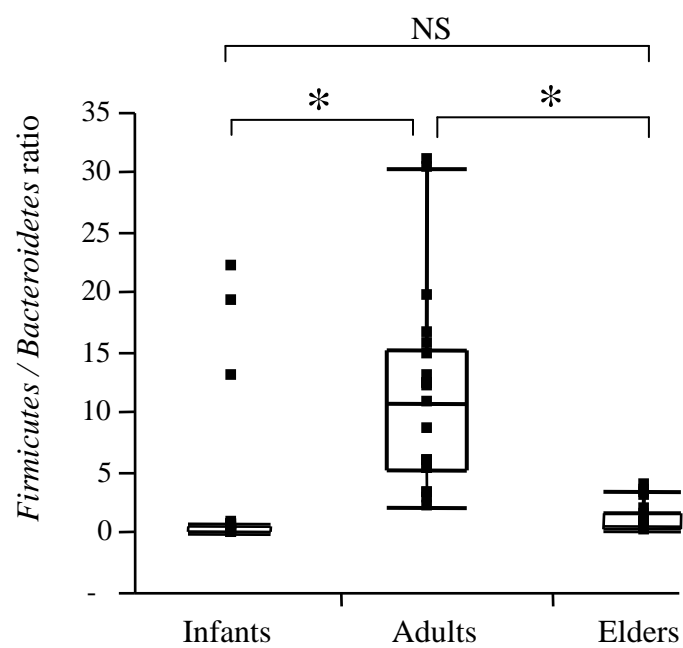

**Figure 2.**

Supplement: 12866_2009_794_MOESM3_ESM.pdf [file 12866_2009_794_MOESM3_ESM.pdf]
